# Supplementary material for: Cutaneous Adverse Reactions to SARS-CoV-2 Vaccines: A Systematic Review and Meta-Analysis
Source: MDPI journal article supplement (doi:10.3390/vaccines10091475), 2022-09-06
Supplement: s1 [file s1]

**Supplementary Table S1: Search Queries**

| Database         | Search Strategy                                                                                                                                                                                                                                                                                                                                                                                                                                                                                                                                                                                                                                                                                                                                                                                                                                                                                                                                                                                                                                                                                                                                                                                                              |
|------------------|------------------------------------------------------------------------------------------------------------------------------------------------------------------------------------------------------------------------------------------------------------------------------------------------------------------------------------------------------------------------------------------------------------------------------------------------------------------------------------------------------------------------------------------------------------------------------------------------------------------------------------------------------------------------------------------------------------------------------------------------------------------------------------------------------------------------------------------------------------------------------------------------------------------------------------------------------------------------------------------------------------------------------------------------------------------------------------------------------------------------------------------------------------------------------------------------------------------------------|
| PubMed / MEDLINE | ("COVID-19 Vaccine*" OR "Sars-Cov-2 Vaccination*" OR "bnt162b2*" OR "Comirnaty*" OR "mrna-1273*" OR "Spikevax*" OR "ChAdOx1*" OR "Vaxzevria*" OR "AZD1222*" OR "ad26.cov2.s*") AND ("Skin*" OR "Hair*" OR "Cutaneous*" OR "dermatology*" OR "delayed*" OR "vesiculo*" OR "bullous*" OR "pustular*" OR "exanthematous*" OR "morbilliform*" OR "pernio-like*" OR "Purpuric*" OR "Annular*" OR "Lichenoid*" OR "Lymphomatoid*") AND ("reaction*" OR "effect*" OR "event*" OR "recurrence*" OR "reactivation*" OR "regression*" OR "Eruption*" OR "rash*" OR "flares*" OR "eczema*" OR "lesion*" OR "pemphigus*" OR "psoriasis*" OR "Erythema*" OR "Pityriasis*" OR "Necrolysis*" OR "pustulosis*" OR "itchiness*" OR "Lichen*" OR "Chilblain*" OR "vasculitis*" OR "alopecia*" OR "pernio*" OR "purpura*" OR "COVID toes*" OR "COVID arm*") NOT ("thrombocytopenia*" OR "cardiological*" OR "neurological*" OR "myocarditis*" OR "thromboembolic*" OR "myopathy*" OR "seroconversion*")                                                                                                                                                                                                                                         |
| Web Of Science   | (ALL=(COVID-19 Vaccine*) OR ALL=(Sars-Cov-2 Vaccination*) OR ALL=(bnt162b2*) OR ALL=(Comirnaty*) OR ALL=(mrna-1273*) OR ALL=(Spikevax*) OR ALL=(ChAdOx1*) OR ALL=(Vaxzevria*) OR ALL=(AZD1222*) OR ALL=(ad26.cov2.s*)) AND (ALL=(Skin*) OR ALL=(Hair*) OR ALL=(Cutaneous*) OR ALL=(dermatology*) OR ALL=(delayed*) OR ALL=(vesiculo*) OR ALL=(bullous*) OR ALL=(pustular*) OR ALL=(exanthematous*) OR ALL=(morbilliform*) OR ALL=(pernio-like*) OR ALL=(Purpuric*) OR ALL=(Annular*) OR ALL=(Lichenoid*) OR ALL=(Lymphomatoid*)) AND (ALL=(reaction*) OR ALL=(effect*) OR ALL=(event*) OR ALL=(recurrence*) OR ALL=(reactivation*) OR ALL=(regression*) OR ALL=(Eruption*) OR ALL=(rash*) OR ALL=(flares*) OR ALL=(eczema*) OR ALL=(lesion*) OR ALL=(pemphigus*) OR ALL=(psoriasis*) OR ALL=(Erythema*) OR ALL=(Pityriasis*) OR ALL=(Necrolysis*) OR ALL=(pustulosis*) OR ALL=(itchiness*) OR ALL=(Lichen*) OR ALL=(Chilblain*) OR ALL=(vasculitis*) OR ALL=(alopecia*) OR ALL=(pernio*) OR ALL=(purpura*) OR ALL=(covid toes*) OR ALL=(covid arm*)) NOT (ALL=(thrombocytopenia*) OR ALL=(cardiological*) OR ALL=(neurological*) OR ALL=(myocarditis*) OR ALL=(thromboembolic*) OR ALL=(myopathy*) OR ALL=(seroconversion*)) |

**Supplementary Table S2: Characteristics of excluded studies**

|   | PMID     | Authors                | Publication Year | Study design                                   | Title                                                                                                                                           | Reason for exclusion                                          |
|---|----------|------------------------|------------------|------------------------------------------------|-------------------------------------------------------------------------------------------------------------------------------------------------|---------------------------------------------------------------|
| 1 | 33783873 | Fernandez-Nieto et al. | 2021             | Cross-sectional                                | Skin manifestations of the BNT162b2 mRNA COVID-19 vaccine in healthcare workers. 'COVID-arm': a clinical and histological characterization      | Only data about delayed local injection reaction are reported |
| 2 | 33838206 | McMahon et al.         | 2021             | Registry-based study                           | Cutaneous reactions reported after Moderna and Pfizer COVID-19 vaccination: A registry-based study of 414 cases                                 | No data about incidence of CARs are reported                  |
| 3 | 33886411 | Wang et al.            | 2021             | Cross-sectional                                | Safety survey by clinical pharmacists on COVID-19 vaccination from a single center in China                                                     | No data about incidence of CARs are reported                  |
| 4 | 34086881 | Jacobson et al.        | 2021             | Cross-sectional, survey-based                  | Incidence and Characteristics of Delayed Injection Site Reaction to the mRNA-1273 SARS-CoV2 Vaccine (Moderna) in a Cohort of Hospital Employees | Only data about delayed local injection reaction are reported |
| 5 | 34254291 | Català et al.          | 2022             | Nationwide, multicentre, cross-sectional study | Cutaneous reactions after SARS-CoV-2 vaccination: a cross-sectional Spanish nationwide study of 405 cases                                       | No data about incidence of CARs are reported                  |
| 6 | 34288056 | Papadimitriou et al.   | 2022             | Cross-sectional study                          | Delayed localized hypersensitivity reactions to COVID-19 mRNA                                                                                   | No data about incidence of CARs are reported                  |

|    |          |                   |      |                                     |                                                                                                                          |                                                                                                                                                                                         |
|----|----------|-------------------|------|-------------------------------------|--------------------------------------------------------------------------------------------------------------------------|-----------------------------------------------------------------------------------------------------------------------------------------------------------------------------------------|
|    |          |                   |      |                                     | vaccines: a 6-month retrospective study                                                                                  |                                                                                                                                                                                         |
| 7  | 34357839 | Talamonti et al.  | 2021 | Cross-sectional study               | Safety of COVID-19 vaccines in patients with psoriasis undergoing therapy with anti-interleukin agents                   | No data about incidence of CARs are reported. Patients with psoriasis under anti-interleukin treatment is the study population, which differs from the target population of our study.  |
| 8  | 34362136 | Skroza et al.     | 2021 | Cohort study                        | Safety and Impact of Anti-COVID-19 Vaccines in Psoriatic Patients Treated with Biologics: A Real-Life Experience         | No data about incidence of CARs are reported. Patients with psoriasis under anti-interleukin treatment are the study population, which differs from the target population of our study. |
| 9  | 34517079 | McMahon et al.    | 2022 | Registry-based study                | Clinical and pathologic correlation of cutaneous COVID-19 vaccine reactions including V-REPP: A registry-based study     | No data about incidence of CARs are reported                                                                                                                                            |
| 10 | 34579248 | Cugno et al.      | 2021 | Cohort study                        | Increased Risk of Urticaria/Angioedema after BNT162b2 mRNA COVID-19 Vaccine in Health Care Workers Taking ACE Inhibitors | Only data about angioedema/urticaria are reported                                                                                                                                       |
| 11 | 34651054 | Hibino et al.     | 2021 | Cross-sectional study               | Delayed Injection Site Reaction After mRNA-1273 Vaccination in Japan: A Retrospective, Cross-Sectional Study             | Only data about delayed local injection reaction are reported                                                                                                                           |
| 12 | 34661934 | Rerknimitr et al. | 2022 | Cross-sectional, survey-based study | Cutaneous adverse reactions from 35,229 doses of Sinovavc and AstraZeneca COVID-19 vaccination: a                        | It is not clear whether reported findings refer to number of participants reporting CARs or number of CARs (also                                                                        |

|    |          |                 |      |                                   |                                                                                                                                                                                      |                                                                                                                                                                                                            |
|----|----------|-----------------|------|-----------------------------------|--------------------------------------------------------------------------------------------------------------------------------------------------------------------------------------|------------------------------------------------------------------------------------------------------------------------------------------------------------------------------------------------------------|
|    |          |                 |      |                                   | prospective cohort study in healthcare workers                                                                                                                                       | multiple CARs per participant) for each administered dose.                                                                                                                                                 |
| 13 | 34699117 | Musumeci et al. | 2022 | Cohort study                      | Safety of SARS-CoV-2 vaccines in psoriatic patients treated with biologics: A real life experience                                                                                   | No data about incidence of CARs are reported. Patients with psoriasis under biologics treatment are the study population, which differs from the target population of our study.                           |
| 14 | 34800601 | Freeman et al.  | 2022 | Registry-based study              | Skin reactions to COVID-19 vaccines: An American Academy of Dermatology/International League of Dermatological Societies registry update on reaction location and COVID vaccine type | No data about incidence of CARs are reported                                                                                                                                                               |
| 15 | 34837354 | Burlando et al. | 2022 | Retrospective descriptive study   | Cutaneous reactions to COVID-19 vaccine at the dermatology primary care                                                                                                              | This study reports data on the incidence of vaccine-associated CARs in a group of patients referring to the dermatology clinic. This group differs from the target population of our study.                |
| 16 | 34866925 | Wang et al.     | 2021 | Cross-sectional, web survey-based | A Web-Based Survey on Factors for Unvaccination and Adverse Reactions of SARS-CoV-2 Vaccines in Chinese Patients with Psoriasis                                                      | This study reports data on the incidence of vaccine-associated CARs in a group of psoriatic patients. This group differs from the target population of our study                                           |
| 17 | 34871159 | Patel et al.    | 2021 | Cohort study                      | COVID-19 vaccine-related presumed allergic reactions and second dose administration by using a two-step graded protocol                                                              | This study reports data on the incidence of vaccine-associated CARs in a group of patients referring to the immunology and allergology clinic. This group differs from the target population of our study. |

|    |          |                  |      |                       |                                                                                                                 |                                                                                                                                                                                                                                                                |
|----|----------|------------------|------|-----------------------|-----------------------------------------------------------------------------------------------------------------|----------------------------------------------------------------------------------------------------------------------------------------------------------------------------------------------------------------------------------------------------------------|
| 18 | 34897821 | Cristaudo et al. | 2022 | Cohort study          | Immunogenicity and safety of anti-SARS-CoV-2 BNT162b2 vaccine in psoriasis patients treated with biologic drugs | This study reports data on the incidence of vaccine-associated flares in a group of psoriatic patients. This group differs from the target population of our study. Furthermore, data about the general incidence of vaccine-associated CARs are not reported. |
| 19 | 34927749 | Massip et al.    | 2022 | Cohort study          | Cutaneous manifestations following COVID-19 vaccination: a multicentric descriptive cohort                      | Only data about patients who presented with vaccine-associated CARs are reported. No incidence of CARs in the general population is reported.                                                                                                                  |
| 20 | 34983707 | Magen et al.     | 2022 | Cohort study          | Chronic spontaneous urticaria after BNT162b2 mRNA (Pfizer-BioNTech) vaccination against SARS-CoV-2              | No data about incidence of general CARs are reported                                                                                                                                                                                                           |
| 21 | 35004790 | Huang et al.     | 2021 | Cohort study          | Exacerbation of Psoriasis Following COVID-19 Vaccination: Report From a Single Center                           | This study reports data on the incidence of vaccine-associated flares in a group of psoriatic patients. This group differs from the target population of our study. Furthermore, data about the general incidence of vaccine-associated CARs are not reported. |
| 22 | 35067996 | Potestio et al.  | 2022 | Cross-sectional study | Atopic dermatitis exacerbation after COVID-19 vaccination in Dupilumab-treated patients                         | This study reports data on the incidence of vaccine-associated flares in a group of atopic dermatitis patients. This group differs from the target population of our study. Furthermore, data about the                                                        |

|    |          |                    |      |                                     |                                                                                                                                                      |                                                                                                                                                                                                             |
|----|----------|--------------------|------|-------------------------------------|------------------------------------------------------------------------------------------------------------------------------------------------------|-------------------------------------------------------------------------------------------------------------------------------------------------------------------------------------------------------------|
|    |          |                    |      |                                     |                                                                                                                                                      | general incidence of vaccine-associated CARs are not reported.                                                                                                                                              |
| 23 | 35179254 | Pakhchanian et al. | 2022 | Retrospective cohort study          | Evaluating the safety and efficacy of COVID-19 vaccination in patients with hidradenitis suppurativa                                                 | This study reports data on vaccine safety in a group of patients with hidradenitis suppurativa. This group differs from the target population of our study.                                                 |
| 24 | 35202509 | Hamed Azzam et al. | 2022 | Cross-sectional study               | COVID-19 vaccine in patients with dermal hyaluronic acid fillers in the tear trough: A retrospective study                                           | This study reports data on vaccine safety in a group of patients who underwent dermal hyaluronic acid fillers procedures. This group differs from the target population of our study.                       |
| 25 | 35243732 | Özgen et al.       | 2022 | Cohort study                        | COVID-19 severity and SARS-Cov-2 vaccine safety in pemphigus patients                                                                                | This study reports data on vaccine safety in a group of pemphigus patients. This group differs from the target population of our study.                                                                     |
| 26 | 35335112 | Hertel et al.      | 2022 | Cohort study                        | Onset of Oral Lichenoid Lesions and Oral Lichen Planus Following COVID-19 Vaccination: A Retrospective Analysis of about 300,000 Vaccinated Patients | This study reports data only on the incidence of vaccine-associated Oral Lichen Planus and Oral Lichenoid Lesions.                                                                                          |
| 27 | 35361536 | Maruyama et al.    | 2022 | Cross-sectional, survey-based study | Adverse reactions to the first and second doses of Pfizer-BioNTech COVID-19 vaccine among healthcare workers                                         | The incidence of vaccine-associated CARs is reported for distinct age groups, but not for the whole study population. Data from this study cannot thus be pooled and analyzed with data from other studies. |

|    |          |                         |      |                                     |                                                                                                                                  |                                                                                                                                                                                                                                                                                                                                                                  |
|----|----------|-------------------------|------|-------------------------------------|----------------------------------------------------------------------------------------------------------------------------------|------------------------------------------------------------------------------------------------------------------------------------------------------------------------------------------------------------------------------------------------------------------------------------------------------------------------------------------------------------------|
| 28 | 35407429 | Grieco et al.           | 2022 | Cross-sectional study               | Effects of Vaccination against COVID-19 in Chronic Spontaneous and Inducible Urticaria (CSU/CIU) Patients: A Monocentric Study   | This study reports data on vaccine safety in a group of patients with chronic spontaneous urticaria. This group differs from the target population of our study.                                                                                                                                                                                                 |
| 29 | 35693768 | Sprow et al.            | 2022 | Chart review                        | Autoimmune Skin Disease Exacerbations Following COVID-19 Vaccination                                                             | This study reports data on vaccine safety in a group of patients with autoimmune skin diseases. This group differs from the target population of our study.                                                                                                                                                                                                      |
| 30 | 35062676 | Rivera-Izquierdo et al. | 2021 | Cross-sectional study               | Factors Associated with Adverse Reactions to BNT162b2 COVID-19 Vaccine in a Cohort of 3969 Hospital Workers                      | This article reports data from the same exact study reported by Ruiz-Villaverde et al. The study population, time frame, setting and incidence data regarding dermatological adverse reactions are exactly the same. However, this article could not be removed as a duplicate, since Rivera-Izquierdo et al. report data on systemic adverse reactions as well. |
| 31 | 35723893 | Potestio et al.         | 2022 | Retrospective study                 | Reply to 'Cutaneous adverse effects of the available COVID-19 vaccines in India: A questionnaire-based study'. by Bawane J et al | This study reports data on the incidence of vaccine-associated CARs in a group of patients referring to the dermatology clinic. This group differs from the target population of our study.                                                                                                                                                                      |
| 32 | 35649530 | Higashino et al.        | 2022 | Retrospective Cross-sectional study | Assessment of Delayed Large Local Reactions After the First Dose of the SARS-CoV-2 mRNA-1273 Vaccine in Japan                    | The primary outcome of the study is to investigate the incidence of delayed large local reactions in vaccine                                                                                                                                                                                                                                                     |

|    |              |                     |      |                                 |                                                                                                                                |                                                                                                                                                          |
|----|--------------|---------------------|------|---------------------------------|--------------------------------------------------------------------------------------------------------------------------------|----------------------------------------------------------------------------------------------------------------------------------------------------------|
|    |              |                     |      |                                 |                                                                                                                                | recipients. Incidence of general cutaneous reactions is not reported.                                                                                    |
| 33 | 35562372     | Pinpathomrat et al. | 2022 | Case-control study              | Immunogenicity and safety of an intradermal ChAdOx1 nCoV-19 boost in a healthy population                                      | The study does not report the incidence of general cutaneous reactions.                                                                                  |
| 34 | 35513961     | Nantanee et al.     | 2022 | Cohort study                    | Immunogenicity and reactogenicity after booster dose with AZD1222 via intradermal route among adult who had received CoronaVac | The study does not report the incidence of general cutaneous reactions.                                                                                  |
| 35 | 35491497     | Guarnieri et al.    | 2022 |                                 | Adverse reactions to BNT162B2 vaccine in health care workers from an Italian Tertiary Care Hospital                            | The study does not report the incidence of general cutaneous reactions.                                                                                  |
| 36 | 35758760     | Tavakoli et al.     | 2022 | Cohort study                    | Pediatric and adolescent COVID-19 vaccination side effects: A retrospective cohort study of the Iranian teenage group in 2021  | The study population (pediatric-teenage vaccine recipients) differs from our target population (general adult population without underlying conditions). |
| 37 | Not Reported | Mohta et al.        | 2022 | Prospective observational study | Clinical and histopathological correlation of the mucocutaneous COVID-19 vaccine reactions: a prospective observational study  | The study does not report the incidence of general cutaneous reactions.                                                                                  |
| 38 | 35470920     | Hertel et al.       | 2022 | Cohort study                    | Real-world evidence from over one million COVID-19 vaccinations is consistent with reactivation of the varicella-zoster virus  | The study reports the incidence of VZV reactivation, not of general cutaneous reactions.                                                                 |
| 39 | Not Reported | Al-Qazaz et al.     | 2022 | Cross-sectional study           | COVID-19 vaccination, do women suffer from more side effects than                                                              | The study reports the incidence of local reactions in women, not of general                                                                              |



|  |  |  |  |  |                                            |                                                |
|--|--|--|--|--|--------------------------------------------|------------------------------------------------|
|  |  |  |  |  | men? A retrospective cross-sectional study | cutaneous reactions in the general population. |
|--|--|--|--|--|--------------------------------------------|------------------------------------------------|

**Supplementary Table S3: outcome measures of included studies**

| PMID     | Author                 | General incidence of CARs (%) | Incidence of CARs occurring after 1st dose (%) | Incidence of CARs occurring after 2nd dose (%) | Incidence of CARs occurring after both doses (%) | General incidence of CARs by vaccine type (%)                                                | Type of cutaneous reactions, as reported by the included studies                                                                                                                                                                                                                                                                                                                                                                                                                                                                                                                        |
|----------|------------------------|-------------------------------|------------------------------------------------|------------------------------------------------|--------------------------------------------------|----------------------------------------------------------------------------------------------|-----------------------------------------------------------------------------------------------------------------------------------------------------------------------------------------------------------------------------------------------------------------------------------------------------------------------------------------------------------------------------------------------------------------------------------------------------------------------------------------------------------------------------------------------------------------------------------------|
| 34320413 | Al Bahrani et al.      | NR                            | 307/1592 (19.28%)                              | NR                                             | NR                                               | NR                                                                                           | Skin rash (n = 307)                                                                                                                                                                                                                                                                                                                                                                                                                                                                                                                                                                     |
| 34976653 | Almohaya et al.        | 73/3639 (2.00%)               | 73/3639 (2.00%)                                | 26/1298 (2.00%)                                | NR                                               | Pfizer – BioNTech: 73/3639 (2.00%)                                                           | Generalized rash (n = 73)                                                                                                                                                                                                                                                                                                                                                                                                                                                                                                                                                               |
| 35429053 | Bawane et al.          | 30/1029 (2.92%)               | 17/358 (4.75%)                                 | 13/671 (1.94%)                                 | NR                                               | NR                                                                                           | First dose (358 respondents):<br><ul style="list-style-type: none"> <li>- Swelling other than site of injection (n = 10)</li> <li>- Urticaria within 24h (n = 2)</li> <li>- Urticaria after 24h (n = 1)</li> <li>- Pytiriasis rosea (n = 1)</li> <li>- Morbilliform rash (n = 3)</li> </ul> Second dose (671 respondents):<br><ul style="list-style-type: none"> <li>- Swelling other than site of injection (n = 8)</li> <li>- Urticaria after 24h (n = 1)</li> <li>- Pytiriasis rosea (n = 2)</li> <li>- Pernio/chilblain (n = 1)</li> <li>- Urticarial vasculitis (n = 1)</li> </ul> |
| 35775860 | Bostan et al.          | 2/234 (0.85%)                 | NR                                             | NR                                             | NR                                               | NR                                                                                           | Exacerbation of psoriasis (n = 1)<br>Acute urticaria (n = 1)                                                                                                                                                                                                                                                                                                                                                                                                                                                                                                                            |
| 35293657 | Bukhari et al.         | 51/1021 (5.00%)               | NR                                             | NR                                             | NR                                               | NR                                                                                           | Maculopapular rash (n = 29)<br>Urticaria (n = 12)<br>Itching (n = 6)<br>Acne (n = 4)<br>Angioedema (n = 3)<br>Other skin manifestations (n = 8)                                                                                                                                                                                                                                                                                                                                                                                                                                         |
| 35780311 | Cebeci Kahraman et al. | 175/2189 (7.99%)              | 94/2290 (4.10%)                                | 81/2189 (3.70%)                                | NR                                               | First dose:<br><ul style="list-style-type: none"> <li>- CoronaVac: 60/2097 (2.9%)</li> </ul> | First dose (2290 respondents):<br><ul style="list-style-type: none"> <li>- Herpes Zoster (n = 17)</li> <li>- Pytiriasis rosea (n = 12)</li> <li>- Petechial rash (n = 1)</li> </ul>                                                                                                                                                                                                                                                                                                                                                                                                     |

|  |  |  |  |  |  |                                                                                                                                                                                                                  |                                                                                                                                                                                                                                                                                                                                                                                                                                                                                                                                                                                                                                                                                                                                                                                                                                                                                                                                                                                                                                                                                                                                                                                                                                              |
|--|--|--|--|--|--|------------------------------------------------------------------------------------------------------------------------------------------------------------------------------------------------------------------|----------------------------------------------------------------------------------------------------------------------------------------------------------------------------------------------------------------------------------------------------------------------------------------------------------------------------------------------------------------------------------------------------------------------------------------------------------------------------------------------------------------------------------------------------------------------------------------------------------------------------------------------------------------------------------------------------------------------------------------------------------------------------------------------------------------------------------------------------------------------------------------------------------------------------------------------------------------------------------------------------------------------------------------------------------------------------------------------------------------------------------------------------------------------------------------------------------------------------------------------|
|  |  |  |  |  |  | <ul style="list-style-type: none"> <li>- BioNTech: 33/183 (18.0%)</li> </ul> <p>Second dose:</p> <ul style="list-style-type: none"> <li>- CoronaVac: 73/2060 (3.5%)</li> <li>- BioNTech: 6/119 (5.0%)</li> </ul> | <ul style="list-style-type: none"> <li>- Dyshidrotic eczema (n = 4)</li> <li>- Urticaria/Angioedema within 24h (n = 6)</li> <li>- Urticaria/Angioedema after 24h (n = 15)</li> <li>- Lichenoid reaction (n = 2)</li> <li>- Erythromelalgia (n = 1)</li> <li>- Contact dermatitis (n = 9)</li> <li>- SDRIFE (n = 1)</li> <li>- Disseminated herpes zoster (n = 1)</li> <li>- Acneiform eruption (n = 1)</li> <li>- Maculopapular rash (n = 9)</li> <li>- Erythroderma (n = 1)</li> <li>- Bullous pemphigoid (n = 2)</li> <li>- Psoriasis vulgaris (n = 2)</li> </ul> <p>Second dose (2189 respondents):</p> <ul style="list-style-type: none"> <li>- Herpes Zoster (n = 10)</li> <li>- Pytiriasis rosea (n = 10)</li> <li>- Dyshidrotic eczema (n = 1)</li> <li>- Urticaria/Angioedema within 24h (n = 6)</li> <li>- Urticaria/Angioedema after 24h (n = 19)</li> <li>- Lichenoid reaction (n = 2)</li> <li>- Contact dermatitis (n = 8)</li> <li>- Disseminated herpes simplex (n = 1)</li> <li>- Maculopapular rash (n = 9)</li> <li>- Chilblain (n = 2)</li> <li>- Cutaneous vasculitis (n = 2)</li> <li>- Psoriasis vulgaris (n = 3)</li> <li>- Cutaneous sarcoidosis (n = 1)</li> <li>- Linear IgA bullous dermatosis (n = 1)</li> </ul> |
|--|--|--|--|--|--|------------------------------------------------------------------------------------------------------------------------------------------------------------------------------------------------------------------|----------------------------------------------------------------------------------------------------------------------------------------------------------------------------------------------------------------------------------------------------------------------------------------------------------------------------------------------------------------------------------------------------------------------------------------------------------------------------------------------------------------------------------------------------------------------------------------------------------------------------------------------------------------------------------------------------------------------------------------------------------------------------------------------------------------------------------------------------------------------------------------------------------------------------------------------------------------------------------------------------------------------------------------------------------------------------------------------------------------------------------------------------------------------------------------------------------------------------------------------|

|          |                     |                     |                 |    |    |                                                  |                                                                                                                                                                                                                                                                                                                                                                                                                                                                  |
|----------|---------------------|---------------------|-----------------|----|----|--------------------------------------------------|------------------------------------------------------------------------------------------------------------------------------------------------------------------------------------------------------------------------------------------------------------------------------------------------------------------------------------------------------------------------------------------------------------------------------------------------------------------|
| 35067984 | Das et al.          | 50/4063<br>(1.23%)  | NR              | NR | NR | Covishield – Astra<br>Zeneca: 50/4063<br>(1.23%) | Telogen effluvium (n = 18)<br>Wheals (n = 12)<br>Generalized pruritus without rash (n = 4)<br>Maculopapular rash (n = 4)<br>Pytirisias rosea (n = 3)<br>Angio-edema (n = 3)<br>Eruptive pseudoangiomatosis (n = 2)<br>Lichen Planus (n = 2)<br>Non-blanchable petechial rash (n = 1)<br>Herpes simplex labialis (n = 1)<br>Pemphigus vulgaris (n = 1)<br>Cheiro-pedo pompholyx (n = 1)                                                                           |
| 34415637 | Durmaz<br>et al.    | NR                  | 33/221 (14.93%) | NR | NR | NR                                               | First dose (221 respondents):<br><ul style="list-style-type: none"> <li>- Urticaria (n = 12)</li> <li>- Herpes reactivation (Zoster: n = 2; Simplex: n = 2)</li> <li>- Papulosquamous/Pytirisiasiform lesions (n = 8)</li> <li>- Angio-edema (n = 3)</li> <li>- Type IV reaction [Erythema Multiforme, Lichenoid Drug Eruption, Drug Hypersensitivity Syndrome] (n = 3)</li> <li>- Palmar erythema (n = 2)</li> <li>- Small vessel vasculitis (n = 1)</li> </ul> |
| 34021625 | Farinazzo<br>et al. | 28/19485<br>(0.14%) | NR              | NR | NR | Pfizer – BioNTech:<br>28/19485 (0.14%)           | Urticarial rash and diffuse urticaria (n = 9)<br>Erythema/dermatitis (n = 8)<br>Generalized pruritus (n = 3)<br>Swelling of face/eyelids (n = 3)<br>Herpes Zoster (n = 2)<br>Pytirisias rosea-like rash (n = 2)<br>Fixed Drug Eruption (n = 1)<br>Cutaneous rash of the trunk (n = 1)<br>Morbilliform eruption (n = 1)                                                                                                                                           |

|          |                 |                   |                  |                  |                |                                                                                              |                                                                                                                                                                                                                                                                                                                                                                                                                                                                                                                                                |
|----------|-----------------|-------------------|------------------|------------------|----------------|----------------------------------------------------------------------------------------------|------------------------------------------------------------------------------------------------------------------------------------------------------------------------------------------------------------------------------------------------------------------------------------------------------------------------------------------------------------------------------------------------------------------------------------------------------------------------------------------------------------------------------------------------|
| 34622531 | Grieco et al.   | 50/2740 (1.82%)   | 28/2740 (1.02%)  | 20/2740 (0.73%)  | 2/2740 (0.07%) | Pfizer – BioNTech: 30/2481 (1.21%)<br>Moderna: 4/37 (10.81%)<br>Astra Zeneca: 16/222 (7.21%) | Urticarial rash/Angioedema (n = 14)<br>Toxic erythema (n = 4)<br>Erythema multiforme (n = 3)<br>Pytirisias rosea-like eruption (n = 3)<br>Stevens-Johnson-Syndrome (n = 1)<br>Morbilliform Drug Exanthema (n = 1)<br>Lymphomatoid drug reaction resembling PLEVA (n = 1)<br>Erythema nodosum (n = 1)<br>Late onset atopic dermatitis (n = 1)<br>Annular lichen planus (n = 1)<br>Pseudo chilblain relapsing with necrotic features at the second dose (n = 1)<br>Filler injection site reaction (n = 1)<br>Genital fixed drug reaction (n = 1) |
| 34816647 | Im et al.       | 93/2498 (3.72%)   | 43/1876 (2.29%)  | 50/1876 (2.67%)  | NR             | NR                                                                                           | First dose (1876 respondents)<br>- Urticaria (n = 43)<br>Second dose (1840 respondents)<br>- Urticaria (n = 50)                                                                                                                                                                                                                                                                                                                                                                                                                                |
| 35058126 | Kitagawa et al. | 648/12109 (5.35%) | 360/7291 (4.94%) | 288/4818 (5.98%) | NR             | NR                                                                                           | First dose (7291 respondents):<br>- Skin rash (n = 360)<br>Second dose (4818 respondents):<br>- Skin rash (n = 288)                                                                                                                                                                                                                                                                                                                                                                                                                            |
| 34439984 | Klugar et al.   | 21/599 (3.51%)    | NR               | NR               | NR             | Pfizer – BioNTech: NR<br>Moderna: NR<br>Astra Zeneca: 7/125 (5.60%)                          | Rash (n = 17)<br>Urticaria (n = 4)<br>Angioedema (n = 4)                                                                                                                                                                                                                                                                                                                                                                                                                                                                                       |
| 34625758 | Lim et al.      | 132/1704 (7.75%)  | 42/1704 (2.5%)   | 90/1704 (5.3%)   | NR             | NR                                                                                           | Skin reaction, not at the injection site (rash, hives, urticaria, itch)<br>- First dose (n = 42)<br>- Second dose (n = 90)                                                                                                                                                                                                                                                                                                                                                                                                                     |

|          |                |                 |               |               |               |                                                            |                                                                                                                                                                                                                                                                 |
|----------|----------------|-----------------|---------------|---------------|---------------|------------------------------------------------------------|-----------------------------------------------------------------------------------------------------------------------------------------------------------------------------------------------------------------------------------------------------------------|
| 35028998 | Oulee et al.   | 5/137 (3.64%)   | 2/137 (8.76%) | 3/137 (5.84%) | 4/137 (2.91%) | Pfizer – BioNTech: 7/62 (11.29%)<br>Moderna 17/75 (22.67%) | Dishydrotic Eczema Flare (n = NR)<br>Pernio/chilblain (n = NR)<br>Psoriasiform dermatitis (n = NR)                                                                                                                                                              |
| 34820975 | Pourani et al. | 95/761 (12.48%) | NR            | NR            | 8/262 (3.05%) | NR                                                         | Skin sensitivity (n = 40)<br>Exanthematous rash (n = 29)<br>Urticaria (n = 25)<br>Petechiae/purpura (n = 16)<br>Vesicular eruption (n = 8)<br>Pernio-like eruption (n = 8)<br>Angioedema (n = 5)<br>Erythema Multiforme-like eruption (n = 2)<br>Zoster (n = 2) |
| 34207369 | Riad et al. 1  | 4/92 (4.34%)    | NR            | NR            | NR            | Astra Zeneca: 4/92 (4.34%)                                 | Skin rash (n = 4)                                                                                                                                                                                                                                               |
| 34577573 | Riad et al. 2  | 18/522 (3.45%)  | NR            | NR            | NR            | Pfizer – BioNTech: 18/522 (3.45%)                          | Rash (n = 8)<br>Angioedema (n = 13)                                                                                                                                                                                                                             |
| 34681273 | Riad et al. 3  | 4/539 (0.74%)   | NR            | NR            | NR            | NR                                                         | Skin rash (n = 2)<br>Skin eruption (n = 2)                                                                                                                                                                                                                      |
| 33916020 | Riad et al. 4  | 45/877 (5.13%)  | NR            | NR            | NR            | Pfizer – BioNTech: 45/877 (5.13%)                          | Rash (n = 28)<br>Urticaria (n = 10)<br>Other (n = 9)                                                                                                                                                                                                            |

|          |                        |                    |                   |                   |                  |                                                                                |                                                                                                                                                                                                                                                                                                                                                                                                                                                                                                                                                                                                                                                                                                |
|----------|------------------------|--------------------|-------------------|-------------------|------------------|--------------------------------------------------------------------------------|------------------------------------------------------------------------------------------------------------------------------------------------------------------------------------------------------------------------------------------------------------------------------------------------------------------------------------------------------------------------------------------------------------------------------------------------------------------------------------------------------------------------------------------------------------------------------------------------------------------------------------------------------------------------------------------------|
| 34160555 | Robinson et al.        | 1541/33039 (4.66%) | 776/40640 (1.91%) | 765/33939 (2.25%) | 101/609 (16.58%) | <p>Pfizer – BioNTech: 278/10445 (2.67%)</p> <p>Moderna: 1263/30195 (4.18%)</p> | <p>First dose (40460 respondents):</p> <ul style="list-style-type: none"> <li>- Itching/rash other than at the injection site (n = 599)</li> <li>- Hives/urticaria (n = 162)</li> <li>- Swelling/angioedema (n = 120)</li> </ul> <p>Second dose (33939 respondents):</p> <ul style="list-style-type: none"> <li>- Itching/rash other than at the injection site (n = 546)</li> <li>- Hives/urticaria (n = 194)</li> <li>- Swelling/angioedema (n = 125)</li> </ul> <p>Both doses (609 respondents):</p> <ul style="list-style-type: none"> <li>- Itching/rash other than at the injection site (n = 81)</li> <li>- Hives/urticaria (n = 20)</li> <li>- Swelling/angioedema (n = 16)</li> </ul> |
| 35775137 | Ruiz-Villaverde et al. | 13/3969 (0.33%)    | NR                | NR                | NR               | <p>Pfizer – BioNTech: 13/3969 (0.33%)</p>                                      | <p>Morbilliform rash (n = 10)</p> <p>Herpes simplex reactivation (n = 5)</p> <p>Herpes zoster reactivation (n = 1)</p> <p>Distal hyperpigmentation (n = 1)</p> <p>Generalized eczema (n = 1)</p>                                                                                                                                                                                                                                                                                                                                                                                                                                                                                               |

NR = Not Reported; SDRIFE = Symmetrical Drug-Related Intertriginous and Flexural Exanthema
