# Supplementary material for: Cutaneous Adverse Reactions to SARS-CoV-2 Vaccines: A Systematic Review and Meta-Analysis
Source: Vaccines (Basel). 2022 Sep 6;10(9):1475. doi: 10.3390/vaccines10091475 (PMC9504216; doi:10.3390/vaccines10091475)
Supplement: Supplementary file 1 [file vaccines-10-01475-s001.zip]

Archive with 9 entries (9 files):
- ISSM_MOOSE_Checklist meta vax covid.pdf
- PRISMA checklist meta covid vaccine .pdf
- Supplementary figure S1.TIF
- Supplementary figure S2.TIF
- Supplementary figure S3.TIF
- Supplementary figure S4.TIF
- Supplementary figure S5.TIF
- Supplementary figure S6.TIF
- Supplementary TABLEs.pdf
